# Supplementary material
Source: ML conference proceedings conference paper supplement (https://openaccess.thecvf.com/content/WACV2021/html/Voigtlaender_Reducing_the_Annotation_WACV_2021_paper.html)
Supplement: Supplementary file 2 [file Voigtlaender_Reducing_the_Annotation_WACV_2021_supplemental.zip]

Archive with 2 entries (2 files):
- 0700-supp.mp4
- 0700-supp.pdf
